# Supplementary material
Source: publisher site journal article supplement (https://www.dovepress.com/article/568058)
Supplement: Supplementary file 1 [file 568058_Supplementary%20material.docx]

**Supplementary Figures and table**

**
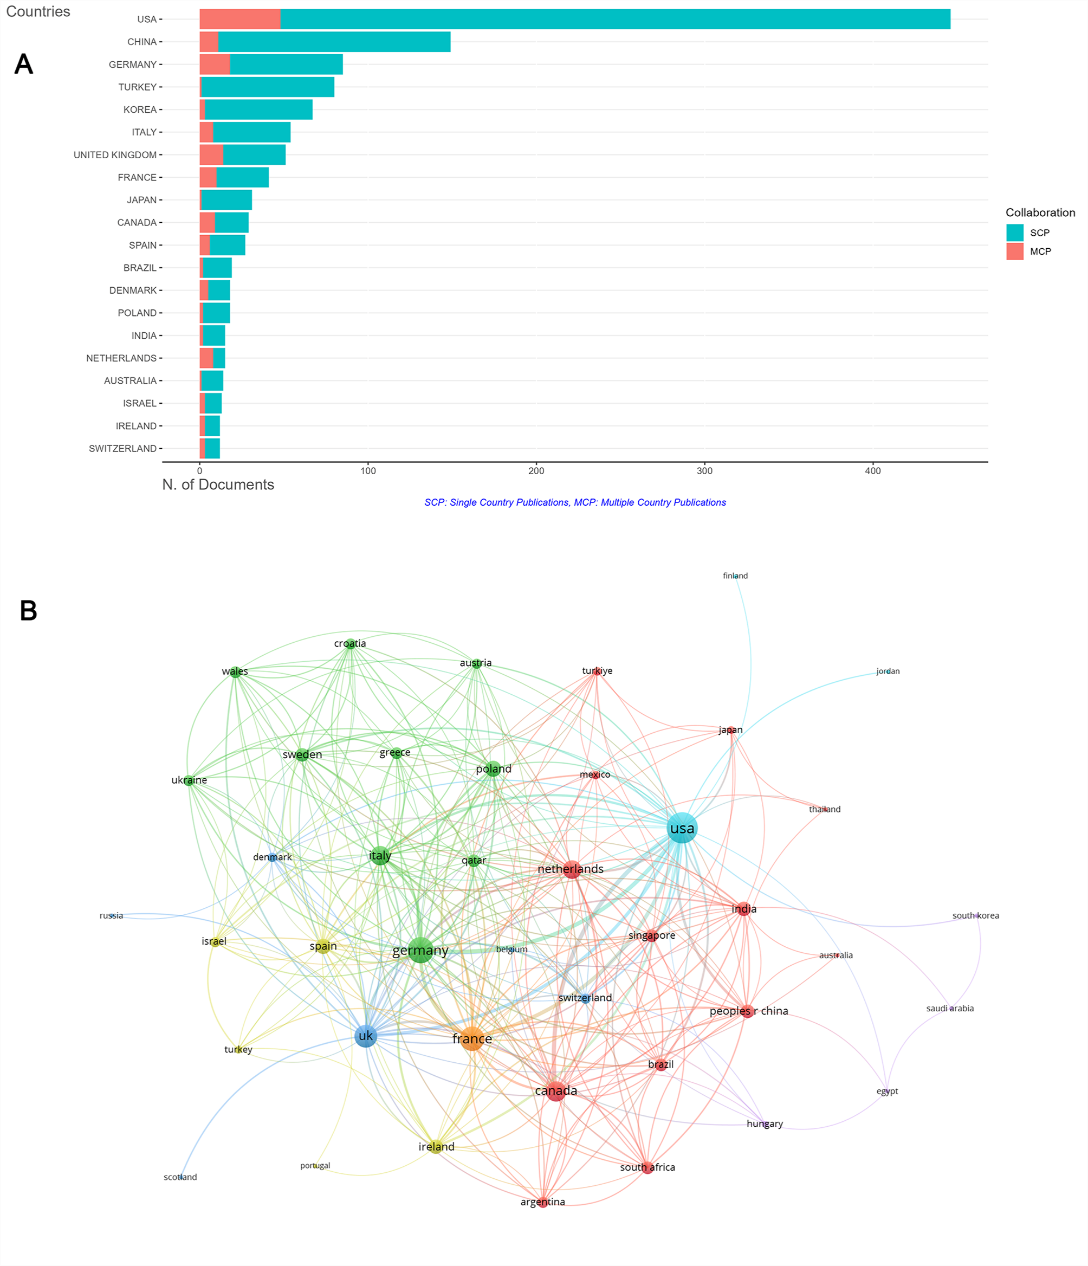
**

**Supplementary Figure S1.** (A) Distribution of corresponding author’s publications by country (R bibliometrix). SCP: Single Country Publications. MCP: Multiple Country Publications. Articsles: Publications of Corresponding Authors only. Freq: Frequence of Total Publications. MCP_Ratio: Proportion of Multiple Country Publications. TP: Total Publications. TP_rank: Rank of Total Publications. TC: Total Citations. TC_rank: Rank of Total Citations. Average Citations: The average number of citations per publication. (B) Visualization map depicting the collaboration among different countries. Nodes represent countries, with size indicating publication count. Links represent co-authorships, with thickness showing collaboration strength. Colors indicate different research clusters. Total link strength in collaboration networks measures the frequency of co-authorship between countries, indicating the level of collaborative research.


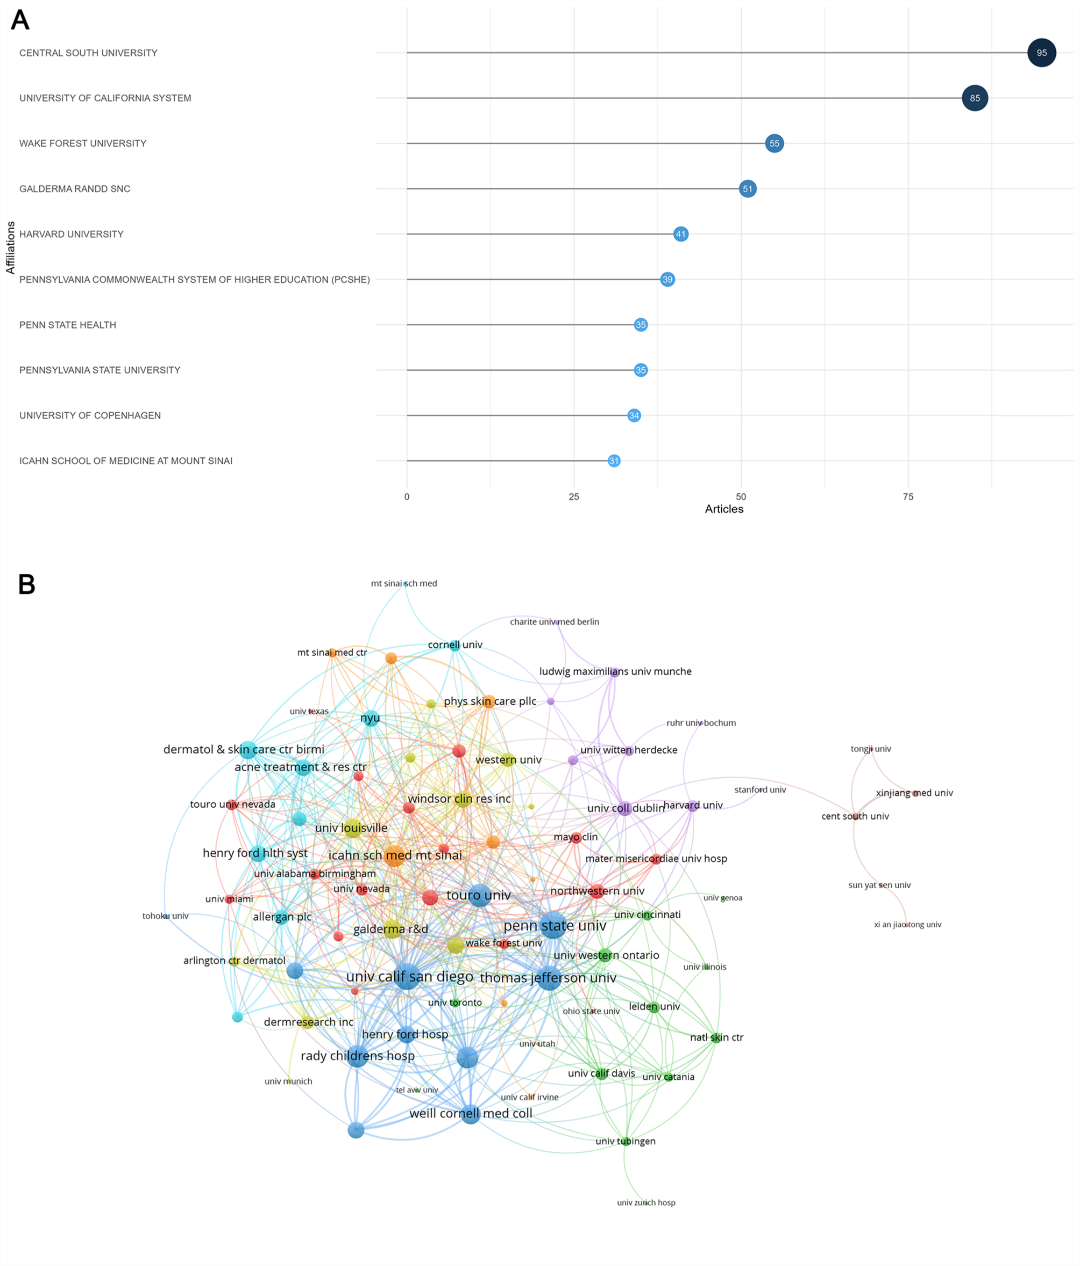


**Supplementary Figure S2.** (A)Top ten institutions by article count and rank. Circle size shows article count. Darker shades indicate higher ranks. (B) Visualization map depicting the collaboration among different institutions. Nodes represent institutions, with size indicating publication count. Links represent co-authorships, with thickness showing collaboration strength. Colors indicate different research clusters. Total link strength in collaboration networks measures the frequency of co-authorship between institutions, indicating the level of collaborative research.


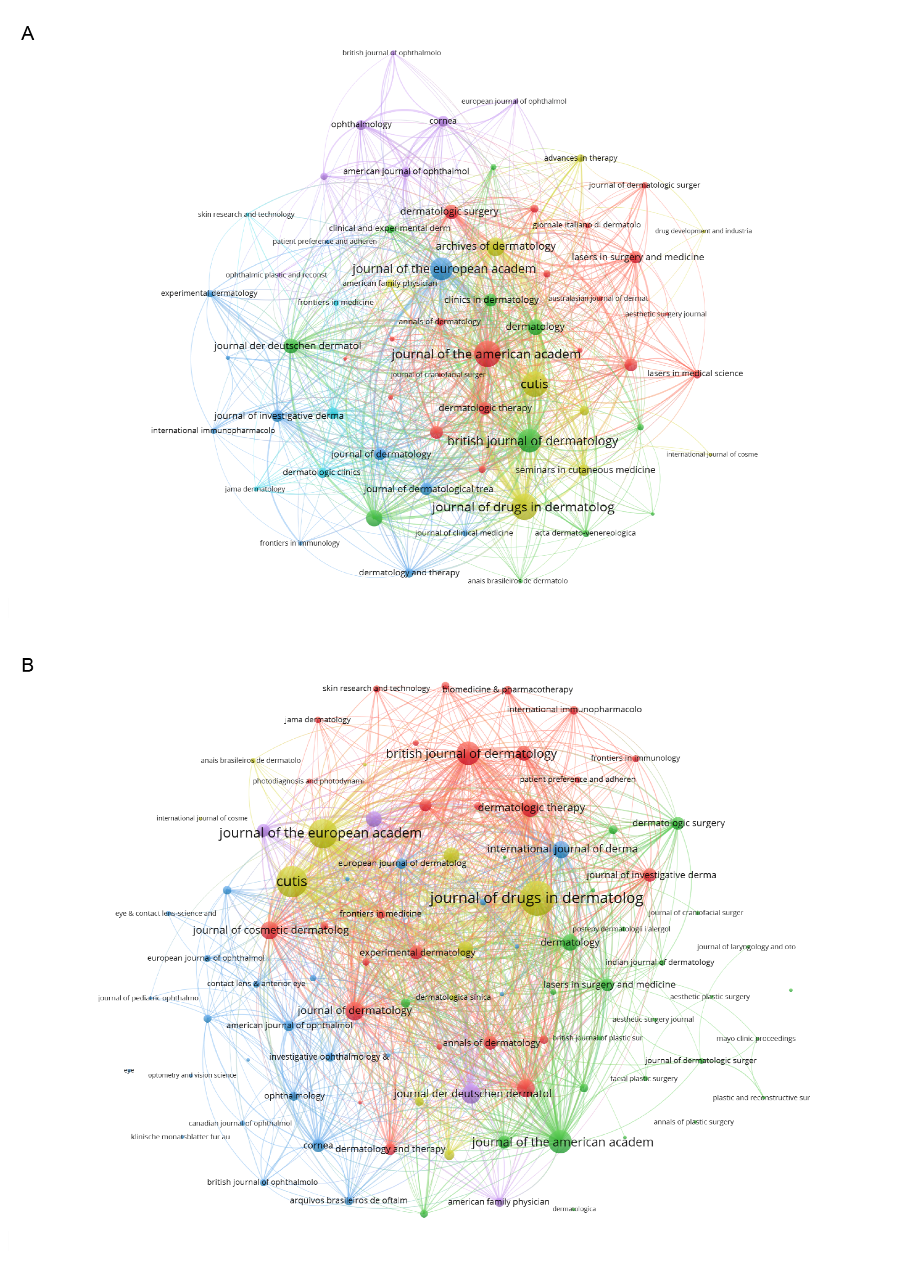


**Supplementary Figure S3.** (A) Co-occurrence Networks: Journal Link Strength in co-occurrence networks measures the frequency with which two journals are cited together within the same articles or references. This metric reflects how often the publications from two different journals are associated in the bibliographies of scholarly articles. High link strength implies that the journals are often cited in tandem, indicating a thematic or topical connection between the research they publish. (B) Coupling Networks: Journal Link Strength in coupling networks assesses the extent to which journals are linked based on the common references cited in their articles. This metric captures the degree to which the research published in two different journals relies on the same body of prior work. A strong link strength in this context signifies that the journals share a substantial number of references, highlighting a shared intellectual foundation or research focus.


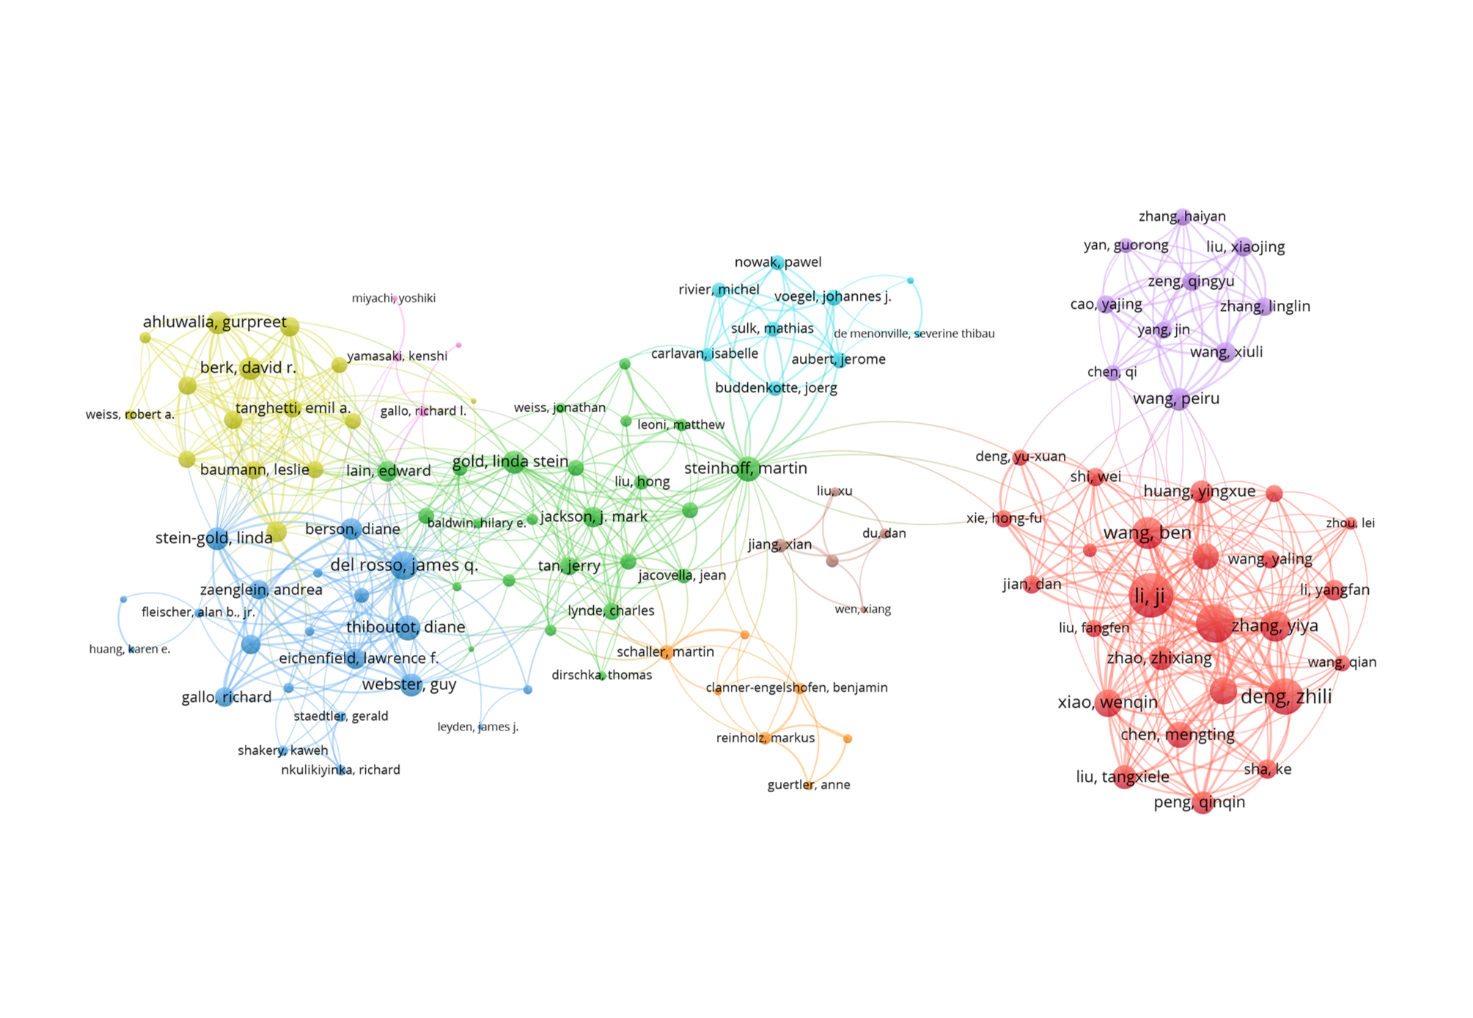


**Supplementary Figure S4.** Visualization map depicting the collaboration among different authors. Nodes represent authors, with size indicating publication count. Links represent co-authorships, with thickness showing collaboration strength. Colors indicate different research clusters. Total link strength in collaboration networks measures the frequency of co-authorship between authors, indicating the level of collaborative research.

**Supplementary Table S1. Summary of Current Rosacea Treatments and Their Mechanisms**

| **Treatment / Modality** | **Keyword Source** | **Mechanism / Target** | **Clinical Notes** |
| --- | --- | --- | --- |
| **Ivermectin** | “ivermectin”, Cluster 1 | Anti-inflammatory; anti-Demodex effects | Effective for papulopustular lesions |
| **Metronidazole** | “metronidazole”, Cluster 1 | Antioxidant and anti-inflammatory | Long-standing topical therapy |
| **Doxycycline (sub-antimicrobial dose)** | “doxycycline”, Cluster 1 | Inhibits inflammatory mediators (MMPs, cytokines) | Reduces inflammatory lesions |
| **Azelaic acid** | “azelaic acid”, Cluster 1 | Reduces ROS; modulates keratinocytes | Strong evidence from RCTs |
| **Laser therapy (PDL, LP Nd:YAG)** | “laser”, “dye-laser”, Cluster 5 | Targets abnormal vascular structures | Best for persistent erythema and telangiectasia |
| **Intense pulsed light (IPL)** | “intense pulsed-light”, Cluster 5 | Selective photothermolysis of vasculature | Improves erythema, telangiectasia, flushing |
| **Carbon dioxide laser** | “carbon-dioxide laser”, Cluster 5 | Ablative remodeling | Used selectively for phymatous changes |
| **Topical therapy (general)** | “topical treatment”, Cluster 1 | Depends on agent | Continues to be core first-line intervention |
| **Clinical trial–driven agents** | “clinical trial”, Cluster 1 | Evidence-based therapies | Reflects growing interest in standardized evaluation |
